# Supplementary material for: PD-L1 Expression in Cutaneous Angiosarcomas: A Systematic Review with Meta-Analysis
Source: Curr Oncol. 2023 May 17;30(5):5135–44. doi: 10.3390/curroncol30050388 (PMC10217767; doi:10.3390/curroncol30050388)
Supplement: Supplementary file 1 [file curroncol-30-00388-s001.zip › Supplementary Table 1.pdf]

**Supplementary Table 1. The Joanna Briggs Institute critical appraisal checklist.**

[illegible]
